Article

# A bHLH transcription factor, SlbHLH96, promotes drought tolerance in tomato

Yunfei Liang<sup>1,†</sup>, Fang Ma<sup>1,†</sup>, Boyu Li<sup>1</sup>, Cong Guo<sup>1</sup>, Tixu Hu<sup>1</sup>, Mingke Zhang<sup>1</sup>, Yan Liang<sup>1</sup>, Jianhua Zhu<sup>2,3,\*</sup> and Xiangqiang Zhan<sup>1,\*</sup>

<sup>1</sup>State Key Laboratory of Crop Stress Biology for Arid Areas and College of Horticulture, Northwest A&F University, Yangling 712100, China

<sup>2</sup>Department of Plant Science and Landscape Architecture, University of Maryland, College Park, MD 20742, USA

<sup>3</sup>School of Life Sciences, Anhui Agricultural University, Hefei 230036, Anhui, China

\*Corresponding authors. E-mail: jhzhu@umd.edu; zhanxq77@nwsuaf.edu.cn

<sup>†</sup>Equal contribution.

## Abstract

Drought stress caused by water deficit reduces plant productivity in many regions of the world. In plants, basic helix–loop–helix (bHLH) transcription factors regulate a wide range of cellular activities related to growth, development and stress response; however, the role of tomato SlbHLHs in drought stress responses remains elusive. Here, we used reverse genetics approaches to reveal the function of SlbHLH96, which is induced by drought and abscisic acid (ABA) treatment. We found that SlbHLH96 functions as a positive regulator of drought tolerance in tomato. Overexpression of SlbHLH96 in tomato improves drought tolerance by stimulating the expression of genes encoding antioxidants, ABA signaling molecules and stress-related proteins. In contrast, silencing of SlbHLH96 in tomato reduces drought tolerance. SlbHLH96 physically interacts with an ethylene-responsive factor, SlERF4, and silencing of SlERF4 in tomato also decreases drought tolerance. Furthermore, SlbHLH96 can repress the expression of the ABA catabolic gene, SlCYP707A2, through direct binding to its promoter. Our results uncover a novel mechanism of SlbHLH96-mediated drought tolerance in tomato plants, which can be exploited for breeding drought-resilient crops.

## Introduction

Plant productivity is significantly limited by various environmental challenges, especially drought stress and soil salinity [1]. Drought is one of the most detrimental abiotic stress conditions for plant growth and development, and severely threatens sustainability in agriculture [2]. Drought influences many aspects of plant physiology and causes abnormal changes in cellular processes [3]. In particular, drought stress causes injuries to biological membranes, which significantly elevate ion leakage from plant cells [4–6]. Drought stress also induces the accumulation of excessive reactive oxygen species (ROS), which can cause oxidative damage [7]. Nonetheless, the ROS H<sub>2</sub>O<sub>2</sub> also acts as a signaling molecule and is involved in regulating stomatal closure, activities of ion channels, and specific stress responses [8]. Drought stress induces the biosynthesis and signaling of the phytohormone abscisic acid (ABA), which triggers a variety of adaptive responses in plants [9]. Under stress conditions, ABA increases the activity of enzymes such as superoxide dismutase (SOD), peroxidase (POD), catalase (CAT), which function in ROS scavenging [10]. In the ABA biosynthetic pathway, the 9-cis-epoxycarotenoid dioxygenase (NCED) genes encode key enzymes involved in the speed-limiting step of ABA biosynthesis [11, 12]. So far, three NCED genes have been isolated and analyzed in tomato [13–15]. For ABA catabolism, the CYP707A1, A2, A3, and A4 genes, encoding 8'-hydroxylases, play a pivotal role in ABA oxidation [16–18]. The principal ABA signaling pathway consists of the primary ABA receptor proteins, such as PYR/PYL/RCAR, protein

phosphatases of type 2C (PP2Cs) from group A, and SNF1-related kinase 2 (SnRK2) [19–22].

The basic helix–loop–helix (bHLH) family is the second largest family of transcription factors in plants. Members of the bHLH transcription factor family contain two highly conserved and functionally different domains, such as the basic domain and the HLH domain. The basic domain, which is located at the N-terminal end of the bHLH structure, is responsible for binding to an E-box sequence present in the promoter regions of the target genes. The HLH domain, which is located at the C-terminal end of the bHLH structure, is important for protein–protein interactions. These protein complexes work at the E-box region to regulate their target genes' transcriptional activity to control a variety of developmental processes. Plant bHLH transcription factors are involved in a wide range of cellular activities related to plant growth and development. For example, the bHLH members regulate seed germination [23], flowering time [24], fruit ripening [25], trichome formation [26], and root hair formation [27]. Furthermore, bHLH transcription factors have a role in plant responses to abiotic stressors such as drought, salt, and cold. Drought, salt, and osmotic stress responses are positively regulated by *Arabidopsis* AtbHLH122. Knockout of AtbHLH122 leads to increased sensitivity to salt and osmotic stress, whereas overexpression of AtbHLH122 improves plant performance under drought, salt, or osmotic stress conditions [28]. Drought tolerance is improved by overexpression of OsbHLH148 in rice plants. The possible mechanism is interaction of OsJAZ1 with OsbHLH148 to activate the jasmonate

Received: 25 January 2022; Accepted: 1 September 2022; Published: 6 September 2022; Corrected and Typeset: 1 December 2022

© The Author(s) 2022. Published by Oxford University Press on behalf of Nanjing Agricultural University. This is an Open Access article distributed under the terms of the Creative Commons Attribution License (<https://creativecommons.org/licenses/by/4.0/>), which permits unrestricted reuse, distribution, and reproduction in any medium, provided the original work is properly cited.

signaling pathway [29]. In *Arabidopsis* and cucumber seedlings, overexpression of *CsbHLH041* improves salt and ABA tolerance [30]. Likewise, overexpression of *SlbHLH22* increases drought and salt tolerance in tomato [31]. Ectopic expression of maize *ZmbHLH55* in *Arabidopsis* improves salt stress tolerance, which is associated with higher ascorbic acid levels in the transgenic plants [32]. In apple, *MdbHLH3* improves cold resistance by elevating anthocyanin accumulation via transcriptional regulation of the anthocyanin biosynthetic genes *MdDFR* and *MdUFGT* under cold conditions [33]. Furthermore, *PtrbHLH* regulates *PtrCAT* expression by direct binding to its promoter and overexpression of *PtrbHLH* in transgenic pummelo (*Citrus grandis*) improves cold tolerance [34].

Ethylene-responsive factors (ERFs) contain an AP2 DNA-binding domain, and this protein family is widely found in higher plants but is absent in mammals, fungi, and yeast [35–38]. Members of the ERF protein family are shown to play key roles in many abiotic stress responses in plants. For example, overexpression of the tomato ERF transcription factor *SITSRF1* in rice improves drought tolerance by upregulating the expression of stress-responsive genes [39]. In addition, overexpression of *OsERF19* in rice plants enhances resistance to salt stress while causing an ABA hypersensitivity phenotype [40]. Overexpression of *OsERF115* improves heat tolerance in rice plants at the vegetative stage [41]. Furthermore, overexpression of *PagERF16* increases salt sensitivity in poplar [42]. In *Arabidopsis*, heterologous overexpression of *SIERF84* increases drought and salt stress resistance [43]. Overexpression of *SIERF5* in tomato plants shows similar effects [44].

Tomato (*Solanum lycopersicum* L.) is one of the world's most commonly grown and commercially significant vegetable crops [45]. Tomato growth, development, and productivity are severely affected by various abiotic stresses, such as salinity, drought, chilling, and high temperatures [46]. Therefore, improving abiotic stress tolerance is increasingly vital for sustainable tomato production. In this study, we used multiple genetics approaches and revealed that *SlbHLH96* is vital for drought tolerance in tomato plants. Our results show that overexpression of *SlbHLH96* in tomato improves drought tolerance, whereas silencing of *SlbHLH96* in tomato reduces drought tolerance. Furthermore, we showed that *SlbHLH96* physically interacts with *SIERF4*, and silencing of *SIERF4* in tomato decreases drought tolerance. *SlbHLH96* binds to the promoter of *SICYP707A2* to downregulate its expression to fine-tune the expression of ABA response-related genes.

## Results

### Identification and characterization of *SlbHLH96* gene in tomato

From RNA-seq experiments (accession numbers SAMN14996375–14996413), we found that *SlbHLH96* is upregulated by drought treatment in tomato (Supplementary Data Figs S1 and S2A), suggesting its potential roles in drought stress responses. *SlbHLH96* encodes a protein with 441 amino acid residues having a molecular weight of 48.74 kDa. The theoretical isoelectric point (pI) of this protein is 6.54, with an instability index of 53.40 and an aliphatic index of 64.81. Conserved domain analysis showed that *SlbHLH96* possesses the typical structure of the bHLH transcription factors. Phylogenetic analysis suggested that *SlbHLH96* is closely related to potato *StbHLH117* (Supplementary Data Fig. S2B). *SlbHLH96* was highly expressed in leaf and flower tissues while its expression was relatively low in root and fruit tissues

(Supplementary Data Fig. S3). To investigate the subcellular localization of *SlbHLH96*, we transiently expressed the *SlbHLH96*–GFP fusion protein in tobacco leaves. Our results showed that GFP protein driven by the 35S promoter spread throughout the cell, whereas the *SlbHLH96*–GFP fusion protein was only observed in the nucleus (Supplementary Data Fig. S4).

### *SlbHLH96* expression is responsive to multiple abiotic stresses and hormone treatments

We examined the expression profile of *SlbHLH96* under different abiotic stress and hormone treatments. *SlbHLH96* expression was substantially induced by low water potential treatments imposed by infusion of polyethylene glycol (PEG; average molecular weight 8000) in the growth medium, and this is consistent with our RNA-seq results from drought-treated plants grown in soil (Fig. 1A and Supplementary Data Fig. S2A). Similar expression patterns of *SlbHLH96* were observed after ABA treatment (Fig. 1E). These results suggest that *SlbHLH96* may function in drought stress responses in an ABA-dependent manner. The expression of *SlbHLH96* appeared to be responsive to other abiotic stresses or hormones (Fig. 1B–D and F–I). However, its expression levels under these conditions were much lower compared with those under drought or PEG treatment. These results indicate that *SlbHLH96* may play a major role in drought stress responses through an ABA-dependent pathway.

### Overexpression of *SlbHLH96* in tomato improves drought tolerance

To investigate the biological significance of *SlbHLH96* in drought tolerance, we produced tomato plants overexpressing *SlbHLH96* in the 'Ailsa Craig' (AC) genetic background (wild type). The expression levels of *SlbHLH96* in two independent  $T_2$  homozygous transgenic lines were examined by qRT–PCR analysis and the results revealed that the transcript abundance of *SlbHLH96* in the OE-*SlbHLH96*-2 and OE-*SlbHLH96*-17 plants was ~60-fold and 55-fold that of the AC plants, respectively (Fig. 2B). We then examined the drought tolerance of the 30-day-old soil-grown *SlbHLH96* overexpression lines and AC plants. Both genotypes were subjected to continuous drought treatment for 12 days. At the beginning of the experiment, the overexpression plants showed a phenotype similar to that of the AC plants (Fig. 2A). However, after 5 days of drought the AC plants started to display a leaf wilting phenotype while the *SlbHLH96* overexpression plants were essentially healthy. Although both genotypes became wilted at the end of 12 days of drought treatment, it was obvious that the AC plants displayed more severe drought-induced damage (such as leaves with drooping petioles) than the overexpression plants (Fig. 2A). All the plants were then re-irrigated for recovery. After recovery for 7 days, ~45–53% of the wilted *SlbHLH96* overexpression plants survived, whereas <20% of the wilted AC plants survived (Fig. 2A and C). In addition, the *SlbHLH96* overexpression plants developed more vigorous root systems than the AC plants during the drought and the recovery period (Fig. 2G–I). We also examined stomatal aperture to determine whether the improved drought stress tolerance in the *SlbHLH96* overexpression plants is related to the difference in stomatal movement. We found that the *SlbHLH96* overexpression plants had much narrower stomatal apertures than the AC plants under drought stress (Fig. 2D and E). Consistent with this observation, detached leaves from the *SlbHLH96* overexpression plants showed a slower water loss rate than leaves from the AC plants (Fig. 2F). These findings indicate that overexpression of *SlbHLH96* in tomato improves drought tolerance at least partly by minimizing water loss.

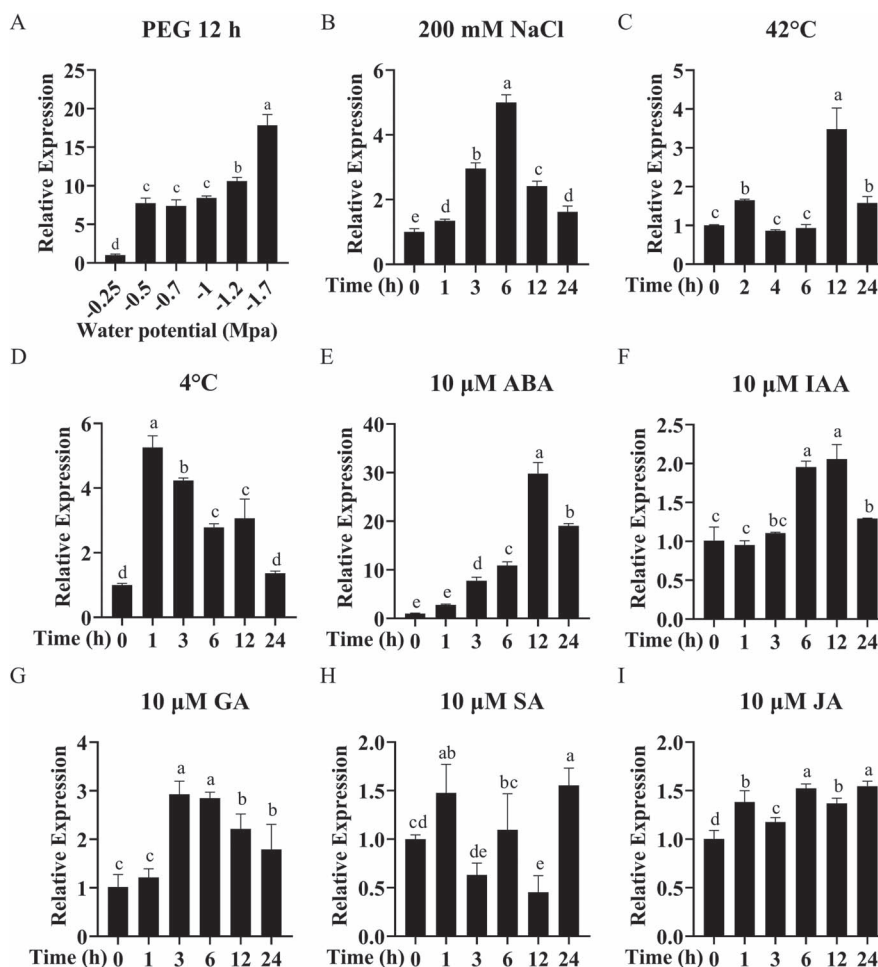

**Figure 1.** *SlbHLH96* is responsive to multiple abiotic stress and hormone treatments in tomato plants. (A–I) *SlbHLH96* expression in tomato seedlings after treatment with low water potential conditions created through PEG-infused agar medium, salt stress (NaCl), heat stress (42°C), cold stress (4°C), ABA, IAA, GA, SA, and JA. The data are means  $\pm$  standard deviation ( $n = 3$ ). Letters indicate significant differences according to one-way ANOVA (Tukey's test;  $P < .05$ ).

## *SlbHLH96* is essential for ROS detoxification under drought stress

$O_2^{\cdot -}$  and  $H_2O_2$  are the two prominent ROS molecules that are commonly accumulated under abiotic stress. Thus, we detected the accumulation of  $O_2^{\cdot -}$  and  $H_2O_2$  in the AC and *SlbHLH96* overexpression plants through nitro blue tetrazolium (NBT) staining (for  $O_2^{\cdot -}$ ) and 3,3'-diaminobenzidine (DAB) staining (for  $H_2O_2$ ) methods under control and drought conditions. Under control conditions, there were no detectable differences in the accumulations of  $O_2^{\cdot -}$  and  $H_2O_2$  between the AC and the *SlbHLH96* overexpression plants. In contrast, under drought stress, the accumulations of  $O_2^{\cdot -}$  and  $H_2O_2$  in the leaves of the *SlbHLH96* overexpression plants were substantially lower than those in the leaves of the AC plants (Fig. 3A–C). These results suggest that *SlbHLH96* overexpression plants possess an enhanced ROS-scavenging capacity under drought stress. Consistent with this observation, we found that the *SlbHLH96* overexpression plants showed increased activities of antioxidant enzymes such as SOD and POD, and elevated proline accumulation, and reduced membrane damage (indicated by reduced electrolyte leakage) and less malondialdehyde (MDA) content under drought stress (Fig. 3D–H). No significant differences in these physiological and biochemical parameters were detected between the AC and *SlbHLH96* overexpression

plants under control conditions. Taken together, these results indicated that the *SlbHLH96* overexpression plants suffered less stress-induced damage than the AC plants.

## *SlbHLH96* regulates the expression of genes involved in ABA biosynthesis, catabolism, and signal transduction

The increased expression level of *SlbHLH96* under ABA treatment prompted us to examine whether the expression of genes involved in ABA biosynthesis, catabolism, and downstream signal transduction pathway was altered in the *SlbHLH96* overexpression plants under drought conditions. The expression of *SlNCED1*, which encodes a key enzyme in ABA biosynthesis, increased in the *SlbHLH96* overexpression plants under both control and drought conditions (Fig. 4A), whereas the expression of *SlCYP707A2*, which encodes a major ABA 8'-hydroxylase essential for ABA catabolism, decreased in the *SlbHLH96* overexpression plants under both control and drought conditions (Fig. 4B). In addition, we showed that the expression of one of the ABA receptors, *SlPYL7*, increased in the *SlbHLH96* overexpression plants under both control and drought conditions while a substantial reduction in the expression of *SlPP2C1* was found in the *SlbHLH96* overexpression plants under both control and drought conditions (Fig. 4C and E). Furthermore, the expression of *SlPP2C4* decreased and the

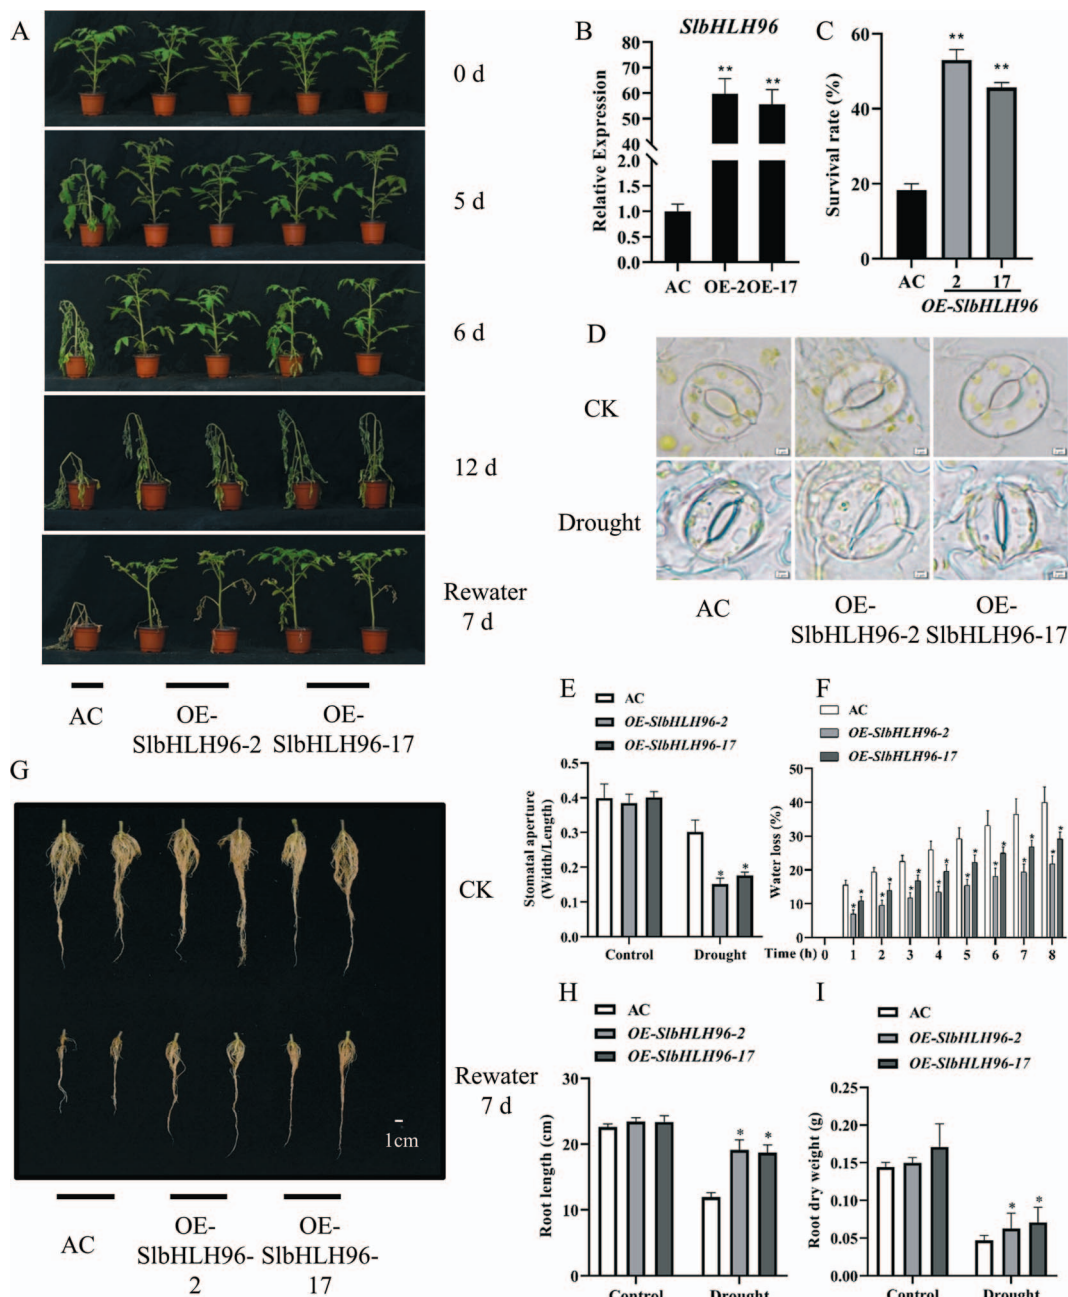

**Figure 2.** Overexpression of *SlbHLH96* in tomato improves drought tolerance. (A) Morphology and responses of wild-type (AC) and *SlbHLH96* overexpression plants. (B) Expression of *SlbHLH96* in AC and *SlbHLH96* overexpression plants. (C) Survival rates of plants shown in (A) after a recovery for 7 days. (D, E) Stomatal aperture analysis. Scale bar in (D) = 2  $\mu$ m. (F) Water loss from detached leaves of AC and *SlbHLH96* overexpression plants. (G) Root morphology of AC and *SlbHLH96* overexpression plants. (H) Quantification of root length of plants shown in (G). (I) Quantification of root dry weight of plants shown in (G). Data are means  $\pm$  standard deviation [ $n = 3$  (there were at least 10 plants per biological replicate)]. Significant differences in mean values are indicated by asterisks: \* $P < .05$ , \*\* $P < .01$  (Student's *t*-test).

expression of *SlSnRK2.6* increased in the *SlbHLH96* overexpression plants under drought conditions (Fig. 4D and F). In addition to the above changes, the reduced expression level of *SlCYP707A2* in the *SlbHLH96* overexpression plants suggests that *SlbHLH96* might act as a negative regulator for ABA catabolism. We then analyzed ABA levels using LC-MS/MS in the *SlbHLH96* overexpression and AC plants. We found that ABA levels were much higher in the *SlbHLH96* overexpression plants than in the AC plants under drought stress (Fig. 4N), and a higher ABA content usually resulted in improved drought resistance. The results suggest that altered expression of genes involved in ABA

biosynthesis, ABA catabolism, and ABA signaling may contribute to the increased drought tolerance of the *SlbHLH96* overexpression plants.

### Expression profiles of stress-related genes in *SlbHLH96* overexpression plants under drought stress

To uncover the potential molecular mechanisms underlying the improved tolerance of the *SlbHLH96* overexpression plants to drought stress, we investigated the transcript levels of stress-related genes, including *SIDREB1*, *SIDREB2A*, *SIAREB1*, *SISOD*,

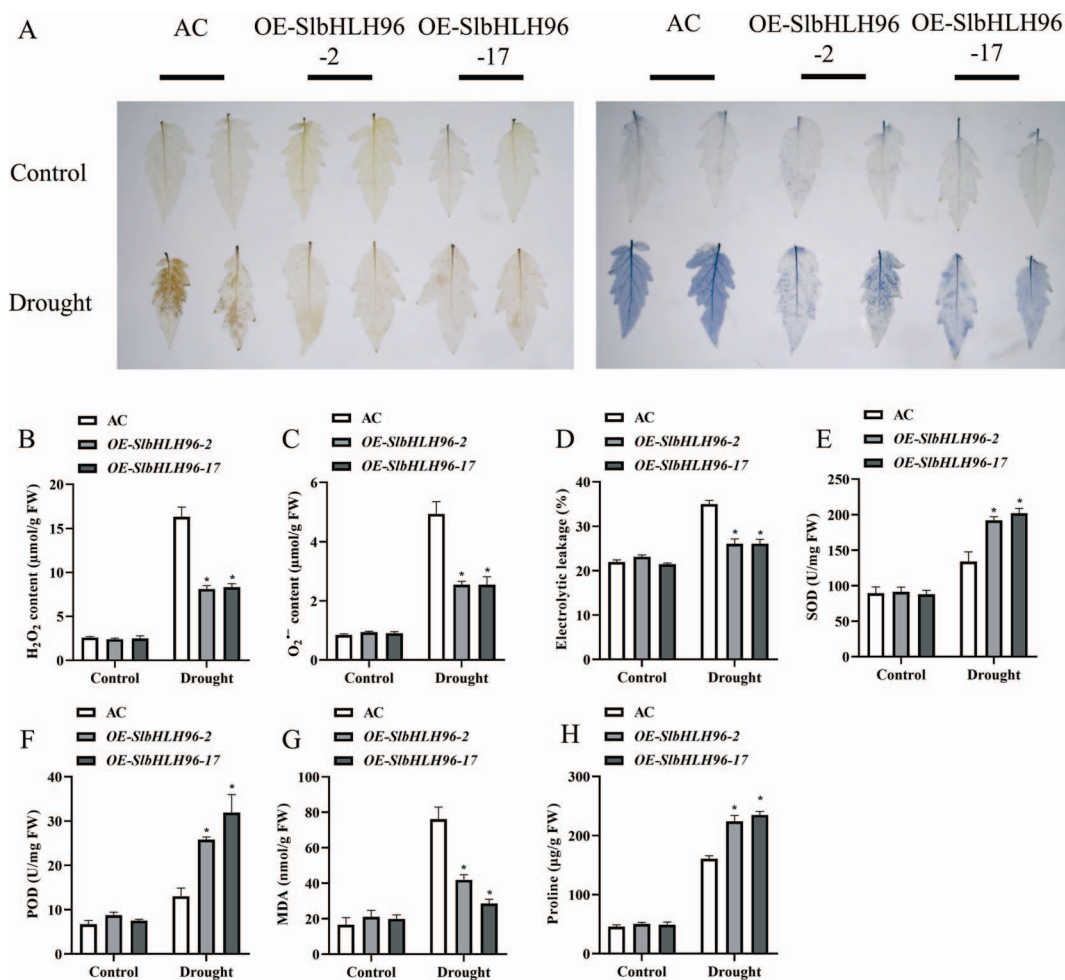

**Figure 3.** *SlbHLH96* overexpression plants showed less stress-induced damage than AC plants. (A) DAB staining for H<sub>2</sub>O<sub>2</sub> and NBT staining for superoxide. (B) H<sub>2</sub>O<sub>2</sub> content. (C) O<sub>2</sub><sup>-</sup> content. (D) Electrolyte leakage assay. (E) SOD activity. (F) POD activity. (G) MDA content. (H) Proline content. Data are means ± standard deviation [n = 3 (there were at least 10 plants per biological replicate)]. Significant differences in mean values are indicated by an asterisk: \*P < .05 (Student's t-test).

SICAT1, and SIAPX1. Compared with the AC plants, the *SlbHLH96* overexpression plants showed higher expression levels of *SIDREB1*, *SIDREB2A*, and *SIAREB1* under drought treatment, whereas no obvious differences in the expression of these genes were detected under control condition (Fig. 4G–I). The expression levels of genes encoding antioxidant enzymes such as *SISOD*, *SICAT1*, and *SIAPX1* were significantly higher in the *SlbHLH96* overexpression plants than in the AC plants under drought (Fig. 4K–M). These findings indicate that *SlbHLH96*-mediated improved drought tolerance is associated with the expression of stress-related genes.

### Silencing of *SlbHLH96* in tomato reduces drought tolerance

To further reveal the essentiality of *SlbHLH96* in basal drought tolerance, the expression of *SlbHLH96* was suppressed by virus-induced gene silencing (VIGS) in tomato. We observed that *SIPDS*-silenced plants showed a photo-bleached phenomenon (Supplementary Data Fig. S5). The expression of *SlbHLH96* in the TRV2:*SlbHLH96* plants significantly decreased by 85% (Fig. 5A), indicating that *SlbHLH96* was efficiently silenced. The control (TRV2:00) and TRV2:*SlbHLH96* plants were immersed in 15% PEG8000 to simulate drought stress. The TRV2:*SlbHLH96* plants became wilted sooner than the TRV2:00 plants after the PEG

treatment (Fig. 5B). Under drought stress, the TRV2:*SlbHLH96* plants showed a higher MDA content than the TRV2:00 plants (Fig. 5D). ROS assay results showed that the accumulations of O<sub>2</sub><sup>-</sup> and H<sub>2</sub>O<sub>2</sub> were higher in the TRV2:*SlbHLH96* plants under drought stress (Fig. 5C, E, and F). Furthermore, we measured the activities of SOD and POD and found that their activities were substantially decreased in the TRV2:*SlbHLH96* plants under drought stress (Fig. 5G and H). These results indicate that silencing of *SlbHLH96* results in drought sensitivity in tomato plants.

We subsequently determined the expression levels of genes involved in ABA biosynthesis, catabolism, and signal transduction in the *SlbHLH96*-silenced and TRV2:00 control plants. The qRT-PCR analysis revealed that *SINCED1* expression was lower and *SlCYP707A2* expression was significantly higher in the TRV2:*SlbHLH96* plants under drought stress (Fig. 6A and B). In addition, we observed a reduction in the expression of *SIPYL7* and *SlSnRK2.6* in the TRV2:*SlbHLH96* plants under drought stress (Fig. 6C and D). However, upregulated expression of *SIPP2C1* and *SIPP2C4* was detected in the TRV2:*SlbHLH96* plants under drought stress (Fig. 6E and F). Finally, we analyzed the expression of some stress- and antioxidant-related genes and found that their expression levels were lower in the *SlbHLH96*-silenced plants than in TRV2:00 control plants under drought stress (Fig. 6G–M).

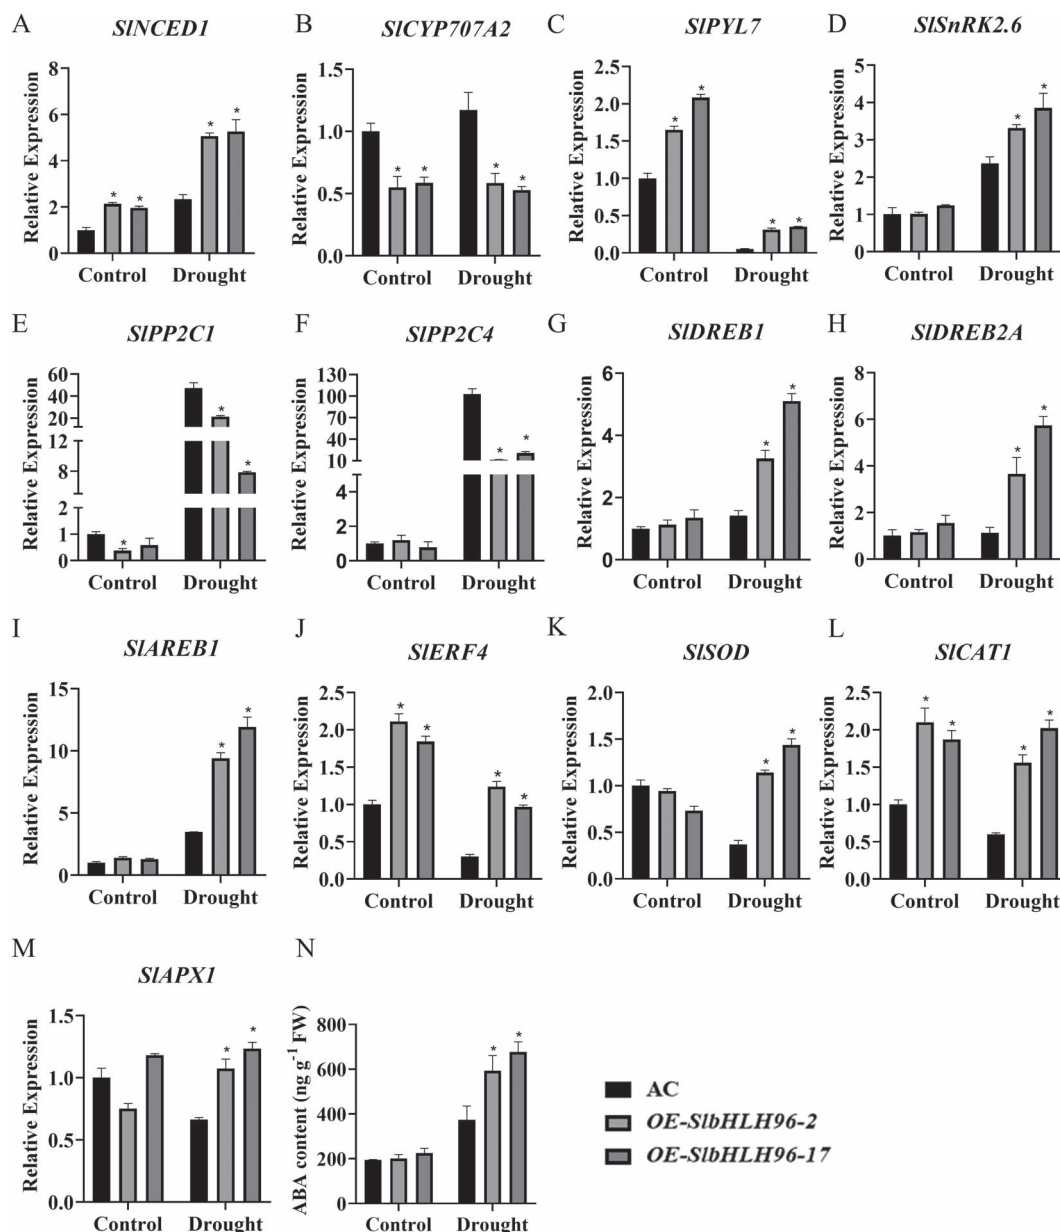

**Figure 4.** Expression profiles of a set of ABA-related genes and stress-related genes as influenced by the *SlbHLH96* overexpression in tomato plants. Relative expression of (A) ABA biosynthetic gene-*SINCED1*, (B) ABA catabolism gene-*SICYP707A2*, (C-F) ABA signal transduction-related genes, and (G-M) stress-related genes. (N) ABA levels in *SlbHLH96* overexpression plants. Data are means  $\pm$  standard deviation ( $n = 3$ ). Significant differences in mean values are indicated by an asterisk:  $*P < .05$  (Student's *t*-test).

### *SlbHLH96* interacts with *SIERF4*

To identify proteins that interact with *SlbHLH96*, a bioinformatics prediction was performed using STRING (<https://cn.string-db.org/>). This *in silico* analysis showed a possibility that *SlbHLH96* could interact with *SIERF4*. *SIERF4* is ubiquitously expressed in all tissues, with slightly less expression in unopened flower buds, fully opened flowers, and ripening fruits at the breaker stage (Supplementary Data Fig. S3). The transcriptional activation activity of *SlbHLH96* was evaluated using a *GAL4* activation system in yeast. Our results suggest that *SlbHLH96* has self-activation activity in yeast, and the C-terminal segments of *SlbHLH96* (*SlbHLH96-C*, *SlbHLH96-CΔ1*, and *SlbHLH96-CΔ2*), including the conserved bHLH domain, do not display the self-activation activity (Fig. 7A). It is possible that the amino acid residues at 101–199 from the N-terminal end of *SlbHLH96* confer the self-activation activity

because the *SlbHLH96-CΔ3* segment still has self-activation activity compared with the *SlbHLH96-CΔ2* segment. Truncated *SlbHLH96* (*SlbHLH96-CΔ2*) was able to interact with *SIERF4* in yeast (Fig. 7B). Bimolecular fluorescence complementation (BiFC) assays were performed to confirm the direct interaction between *SlbHLH96* and *SIERF4* in tobacco plants. Co-expression of *SlbHLH96*-cYFP and *SIERF4*-nYFP generated fluorescent signals in the nucleus, where both these two transcription factors are localized (Fig. 7C). The pull-down assay and split-luciferase assay also confirmed the interaction between full-length *SlbHLH96* and *SIERF4* (Fig. 7D and E). In addition, the expression levels of *SIERF4* were higher in the *SlbHLH96* overexpression plants than in the AC plants under control conditions and drought treatment (Fig. 4). In contrast, the expression of *SIERF4* was reduced in the *SlbHLH96*-silenced plants under control conditions and drought treatment

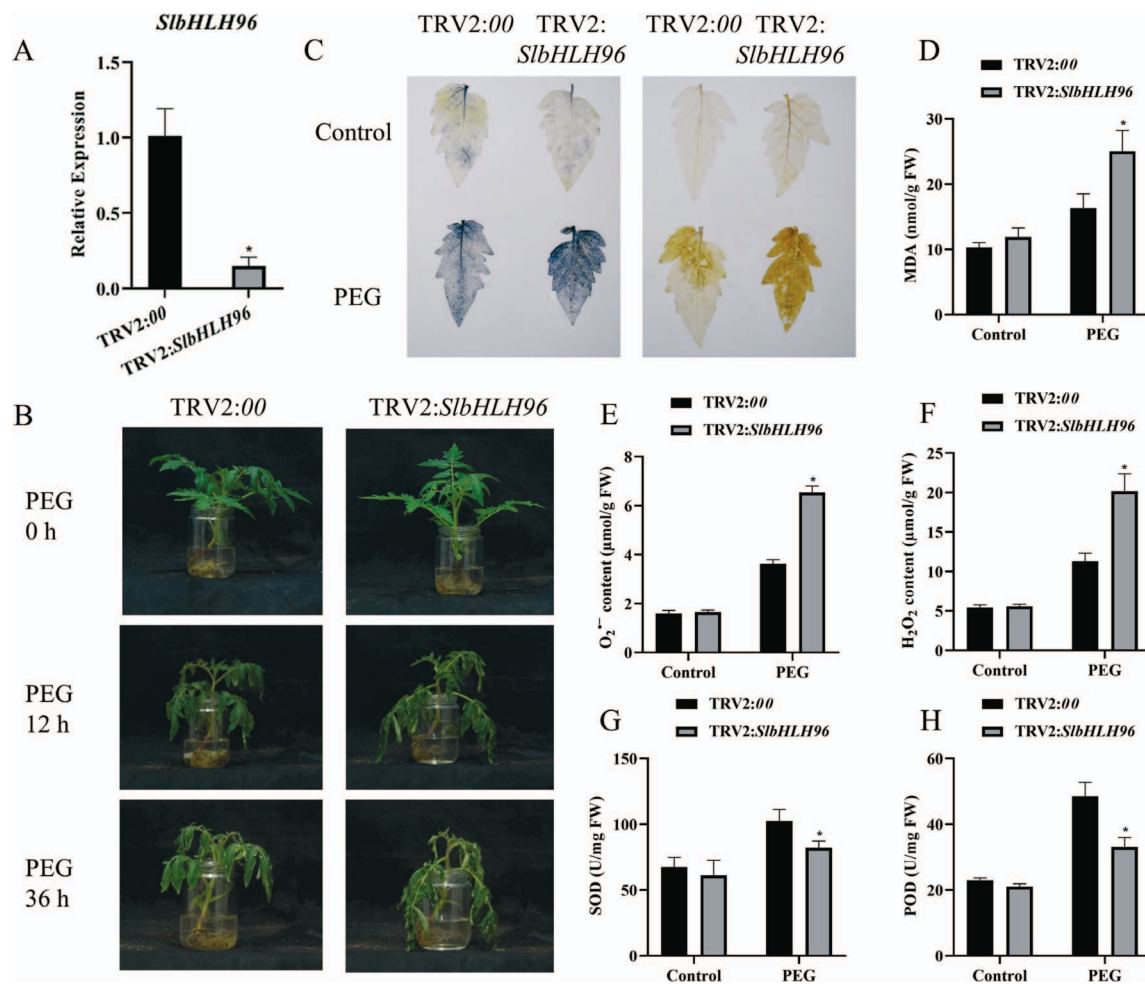

**Figure 5.** Silencing of *SlbHLH96* in tomato reduces drought stress tolerance. (A) Expression of *SlbHLH96* in *SlbHLH96*-silenced (TRV2:*SlbHLH96*) and control (TRV2:00) plants. (B) Phenotype of *SlbHLH96*-silenced and control plants exposed to 15% PEG8000. (C) NBT staining for superoxide and DAB staining for H<sub>2</sub>O<sub>2</sub>. (D) MDA content. (E) O<sub>2</sub><sup>-</sup> content. (F) H<sub>2</sub>O<sub>2</sub> content. (G) SOD activity. (H) POD activity. Data are means ± standard deviation [*n* = 3 (there were at least 10 plants per biological replicate)]. Significant differences in mean values are indicated by an asterisk: \**P* < .05 (Student's *t*-test).

(Fig. 6). These results suggest that *SlbHLH96* may function as a positive regulator for *SlERF4* expression.

### Silencing of *SlERF4* in tomato decreases tolerance to drought stress

A previous study showed that *SlERF4* antisense plants exhibited salt stress-dependent growth inhibition [47]. However, the function of *SlERF4* in the response to drought stress in tomato remains unknown. A particular 300-bp sequence of *SlERF4* was selected to knock down *SlERF4* following a VIGS protocol. Our qRT-PCR analysis revealed that the expression of *SlERF4* was significantly reduced by VIGS in the TRV2:*SlERF4* tomato plants (Fig. 8A). Compared with the control (TRV2:00) plants, *SlERF4* knockdown (TRV2:*SlERF4*) plants were sensitive to drought stress simulated by 15% PEG8000 (Fig. 8B). The TRV2:*SlERF4* plants showed a higher MDA content than the TRV2:00 plants (Fig. 8D). In addition, ROS assay showed that the TRV2:*SlERF4* plants accumulated more O<sub>2</sub><sup>-</sup> and H<sub>2</sub>O<sub>2</sub> than the TRV2:00 plants (Fig. 8C, E, and F). Consistent with this observation, SOD and POD activities were lower in the TRV2:*SlERF4* plants (Fig. 8G–H). We subsequently observed that the transcript levels of some stress- and antioxidant-related genes were significantly lower in the *SlERF4* knockdown plants under drought stress (Fig. 8I–R).

### *SlbHLH96* can repress *SlCYP707A2* expression through direct binding to cis-elements in its promoter

A previous study showed that *AtbHLH122* can bind to the G-box/E-box in the *AtCYP707A3* promoter [28]. *SlCYP707A2* was identified as the closest homolog to *AtCYP707A3* (75.05% similarity at the amino acid level). *SlCYP707A2* is expressed at a relatively low abundance in all tissues in tomato (Supplementary Data Fig. S3). The consensus cis-elements (one G-box and three E-boxes) were found in the putative promoter region of *SlCYP707A2* (Supplementary Data Fig. S6A). *AtCYP707A3* and *SlCYP707A2* share ~40% sequence similarity at the DNA level in their putative promoter regions (Supplementary Data Fig. S6B). To examine whether *SlbHLH96* can repress the transcription of *SlCYP707A2*, the dual-luciferase reporter assay was performed in tobacco plants. The dual-luciferase assay revealed that *SlbHLH96* can repress the activity of the *SlCYP707A2* promoter. After mutating all three E-boxes and one G-box, *SlbHLH96* could not repress the activity of the *SlCYP707A2*-mut promoter (Fig. 9A–C). Furthermore, *SlbHLH96* was able to bind to the *SlCYP707A2* promoter fragments that contained the cis-elements determined by yeast-one hybrid (Y1H) assays (Fig. 9D). The electrophoretic mobility shift assay (EMSA) further confirmed that *SlbHLH96* could directly target the *SlCYP707A2* promoter by binding to the E-box and G-box

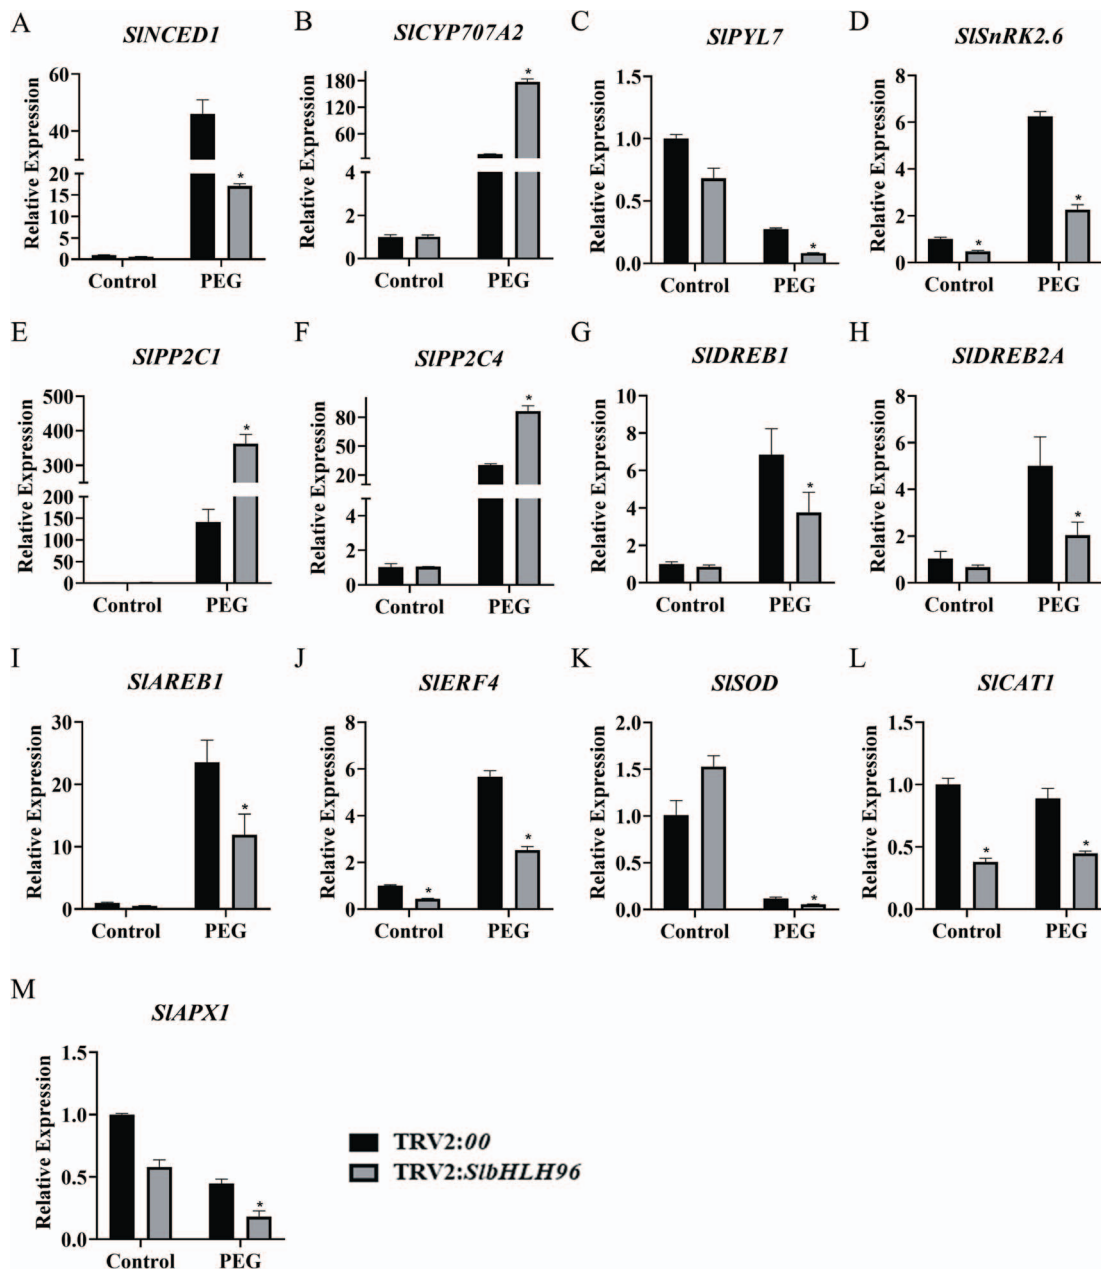

**Figure 6.** Expression profiles of a set of ABA-related genes and stress-related genes in *SlbHLH96*-silenced plants. (A) ABA biosynthetic gene *SINCE1*. (B) ABA catabolism gene *SICYP707A2*. (C–F) ABA signal transduction-related genes. (G–M) Stress-related genes. Data are means  $\pm$  standard deviation ( $n=3$ ). Significant differences in mean values are indicated by an asterisk:  $*P < .05$  (Student's t-test).

*cis*-elements (Fig. 9E). The signal was reduced when an unlabeled *SICYP707A2* probe was introduced to the system as a cold probe (Fig. 9E). Collectively, these results indicate that *SlbHLH96* can repress *SICYP707A2* expression through direct binding to the *cis*-elements in its promoter. Furthermore, we determined whether *SIERF4* could regulate the expression of *SICYP707A2*. The dual-luciferase assay revealed that *SIERF4* could not regulate the expression of *SICYP707A2*, but the interaction between *SIERF4* and *SlbHLH96* enhanced the inhibitory effect of *SlbHLH96* on the expression of *SICYP707A2* (Supplementary Data Fig. S7). Previous studies showed that bHLH proteins *CsbHLH18* and *PtrbHLH* could bind and regulate antioxidant genes [34, 48, 49], but our results indicated that *SlbHLH96* could not regulate the antioxidant enzyme genes *SICAT1* and *SIPOD* in tomato (Supplementary Data Fig. S8).

## Discussion

In recent years, a significant reduction in crop productivity due to drought stress has emerged as a critical issue for the sustainability of global agriculture. Numerous investigations have demonstrated that overexpression of bHLH transcription factors can generate drought resistance in diverse plant species [28, 29, 31]. Nevertheless, few tomato bHLH proteins have been reported to play vital roles in drought responses. Herein, we characterized a bHLH transcription factor gene, *SlbHLH96*, which is responsive to drought stress and ABA treatment. Overexpression of *SlbHLH96* enhanced drought resistance, while silencing of *SlbHLH96* in tomato reduced drought tolerance, which was associated with ROS metabolism. The AP2/ERF transcription factor family includes DREB proteins as a subfamily. DREB genes have been implicated in drought stress responses in a variety of plant species [50–52]. *SIAREB1* is a bZIP



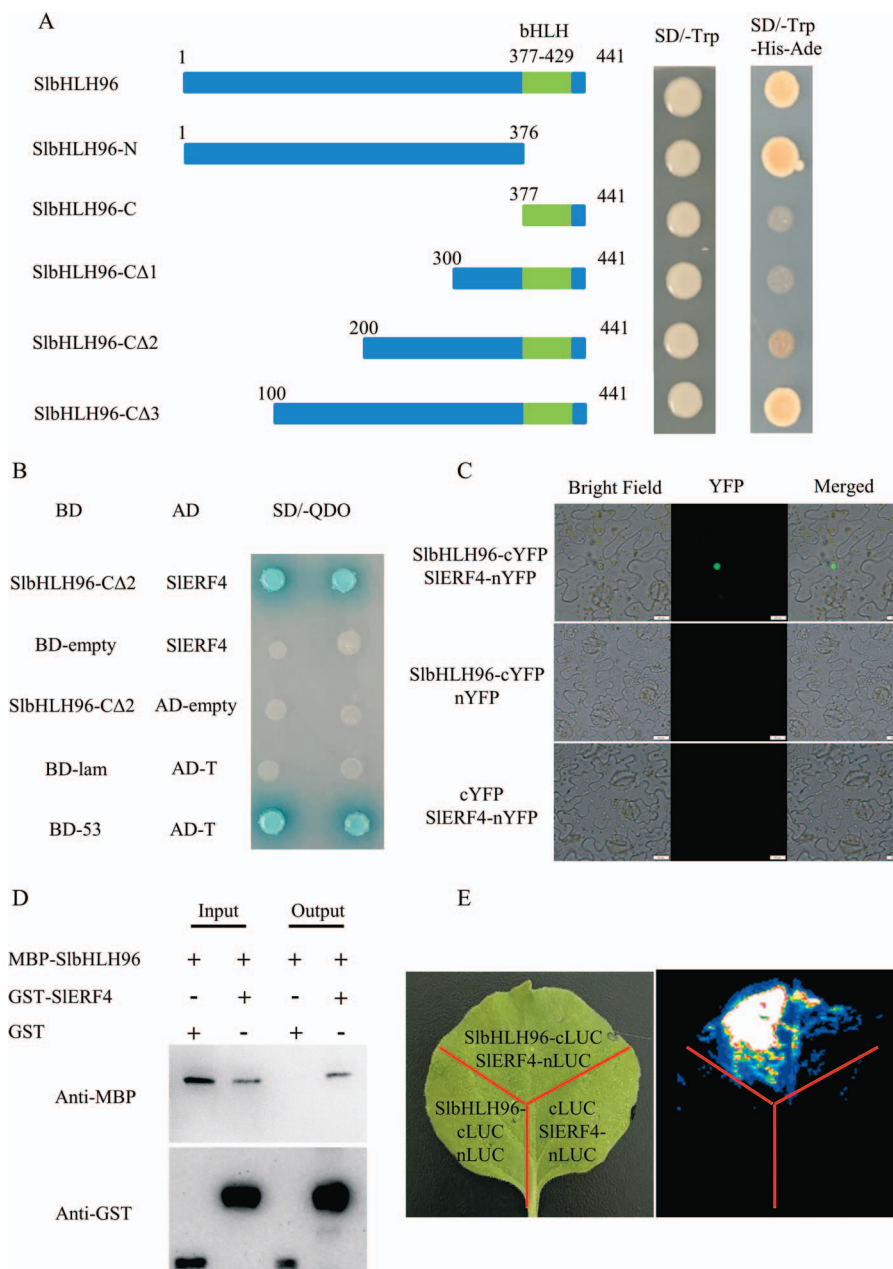

**Figure 7.** SlbHLH96 and SlERF4 physically interact with each other. (A) Self-activation test of SlbHLH96 protein in yeast. Schematic diagram showing the SlbHLH96 deletions to test self-activation activity. (B) Y2H assays of SlbHLH96 and SlERF4. Yeast cells were grown on SD–Ade–His–Leu–Trp with 20  $\mu$ g/ml X- $\alpha$ -Gal. (C) BiFC analysis of SlbHLH96 and SlERF4 in tobacco. Scale bar = 20  $\mu$ m. (D) Pull-down assay of SlbHLH96 and SlERF4 *in vitro*. MBP–SlbHLH96 and GST–SlERF4 proteins were purified and detected by western blotting. (E) Split-luciferase assay of SlbHLH96 and SlERF4 in tobacco.

transcription factor that belongs to the AREB/ABF subfamily, and it confers drought and salt stress tolerance in tomato [53]. In the current study, the expression of stress-related genes (*SlDREB1*, *SlDREB2A*, and *SlAREB1*) increased significantly in the *SlbHLH96* overexpression plants under drought stress, while the expression of these stress-related genes decreased significantly in the *SlbHLH96*-silenced plants.

ABA is sensed by the PYL ABA receptor proteins [20, 21]. In this study, *SlPYL7* expression increased in the *SlbHLH96* overexpression plants under both control and drought conditions while downregulated expression of *SlPYL7* was detected in the *SlbHLH96*-silenced plants under drought stress. In *Arabidopsis*, *AtPYL9* promotes drought resistance and leaf senescence [54]. In comparison with wild-type plants, *SlPYL9* overexpression

lines showed increased drought tolerance, but *SlPYL9*-RNAi lines showed weak tolerance [55]. Overexpression of cotton *PYL10*, *PYL12*, and *PYL26* independently in *Arabidopsis* improves tolerance to drought stress [56]. *ZmPYL8* or *ZmPYL9* overexpression in *Arabidopsis* increases drought resistance [57]. In this study, downregulated expression levels of *SIPP2C1* and *SIPP2C4* were found in the *SlbHLH96* overexpression plants under drought conditions, while upregulated expression levels of *SIPP2C1* and *SIPP2C4* were detected in the *SlbHLH96*-silenced plants under drought stress. *SIPP2C3* overexpression plants were found to be more drought-sensitive than wild-type plants, while *SIPP2C3*-RNAi plants showed a considerable increase in drought tolerance [58]. Compared with wild-type plants, *SIPP2C1*-RNAi transgenic lines showed improved drought tolerance [59]. In the case of

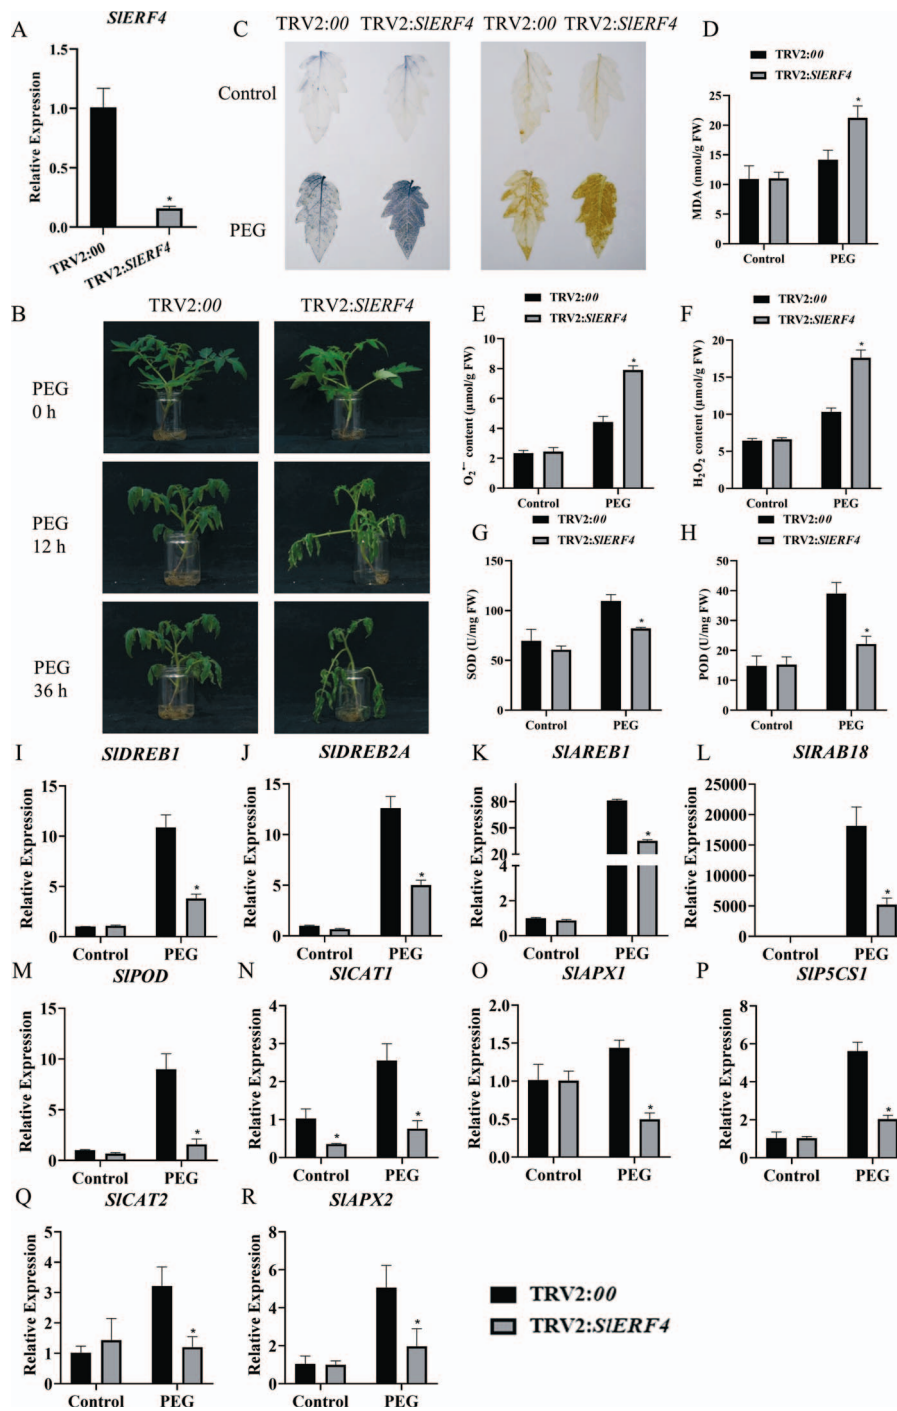

**Figure 8.** Silencing of *SlERF4* in tomato reduces drought stress tolerance. (A) Expression of *SlERF4* in *SlERF4*-silenced (TRV2:*SlERF4*) and control (TRV2:00) plants. (B) Phenotype of *SlERF4*-silenced and control plants exposed to 15% PEG8000. (C) NBT staining for superoxide and DAB staining for  $H_2O_2$ . (D) MDA content. (E)  $O_2^{\cdot -}$  content. (F)  $H_2O_2$  content. (G) SOD activity. (H) POD activity. (I–R) Expression profiles of stress-related genes in *SlERF4*-silenced and control plants under drought stress. Data are means  $\pm$  standard deviation ( $n=3$ ). Significant differences in mean values are indicated by an asterisk: \* $P < 0.5$  (Student's t-test).

ABA signaling, *OsPP2C9* has a positive effect on plant growth but a detrimental effect on drought tolerance [60]. Wheat *PP2C-a10* decreased drought tolerance of transgenic *Arabidopsis* [61]. In *Arabidopsis*, overexpression of *ZmPP2C-A6* reduced drought tolerance [62]. In this study, increased *SlSnRK2.6* expression was found mainly under drought stress in the *SlbHLH96* overexpression plants, while downregulated expression of *SlSnRK2.6* was detected in the *SlbHLH96*-silenced plants under drought stress. In transgenic *Arabidopsis*, overexpression of cucumber *CsSnRK2.5*

improves drought tolerance [63]. Overexpression of *MpSnRK2.10* confers resistance to drought in apple [64]. Drought tolerance is severely diminished in the *Arabidopsis srk2d/e/i* triple mutant [65, 66].

A previous bioinformatics prediction showed that *SlbHLH96* is a non-G-box-binding protein [67]. Although *SlbHLH132* is predicted as a non-DNA-binding protein, the EMSA result showed that *SlbHLH132* is a G-box cis-element DNA-binding protein [68]. By Y1H, EMSA, and dual-luciferase analyses, we demonstrated

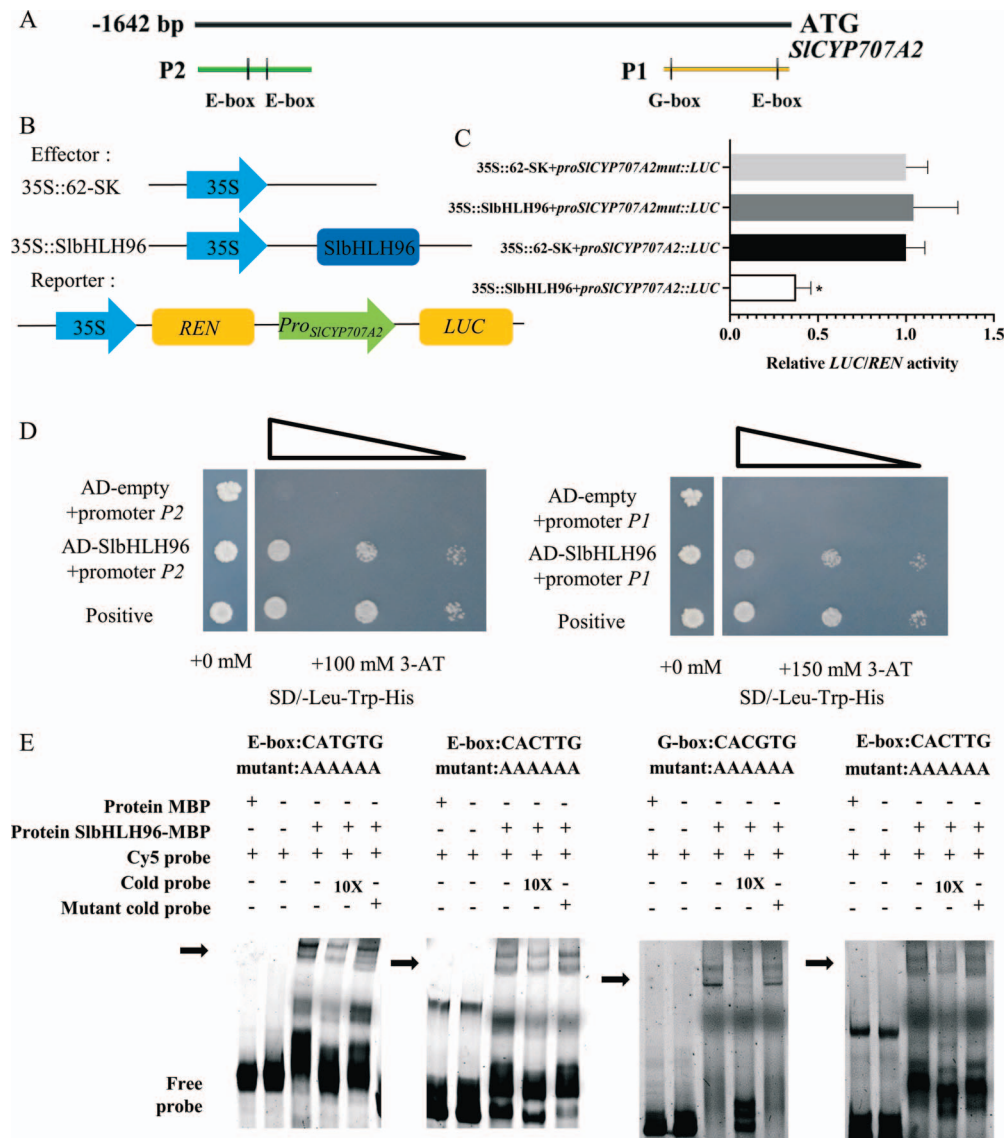

**Figure 9.** SlbHLH96 directly binds to the SICYP707A2 promoter and represses its expression. (A) Schematic diagrams of G-box and E-box motifs in the putative SICYP707A2 promoter. (B) Schematic representation of the reporter and effector. (C) Relative luciferase activity from the dual-luciferase reporter assays in *N. benthamiana* leaves. *proSICYP707A2mut*: three E-boxes and one G-box of the SICYP707A2 promoter were mutated. (D) Y1H assay demonstrating that SlbHLH96 binds directly to the SICYP707A2 promoter. pGADT7 served as a negative control. (E) Interaction between SlbHLH96 protein and the SICYP707A2 promoter in the EMSA. Protein MBP was the negative control. Cold probe was unlabeled. Mutated probes of SICYP707A2 promoter fragments had a mutated E-box and G-box where CANNNTG was replaced with AAAAAA. The black arrow indicates the specific binding complexes. Data are means  $\pm$  standard deviation ( $n = 3$ ). Significant differences in mean values are indicated by an asterisk: \* $P < .05$  (Student's t-test).

that SlbHLH96 directly binds to cis-elements (E-box and G-box) in the SICYP707A2 promoter region to downregulate its transcription. The increased level of endogenous ABA in the *SlbHLH96* overexpression plants might be caused by the direct repression of SICYP707A2 transcription by SlbHLH96. Improved ABA-inducible gene expression and increased drought tolerance are both seen in the *atcyp707a3* mutant [17]. In sweet cherry, when *PacCYP707A1* was silenced, fruits were more resistant to drought stress than control fruits [69].

Multiple functions of tomato SlERF4 have been reported. Compared with the wild type, SlERF4 knockdown tomato plants displayed a salt stress-sensitive phenotype [47]. SlERF4 is desumoylated by the *Xanthomonas* type III effector XopD, which suppresses ethylene responses and enhances pathogen growth. During Xcv infection, SlERF4 is essential for the activation of XopD-repressed genes [70]. Overexpression of ERF4-SRDX

(chimeric dominant repressor version) causes a significant delay in ripening as well as increased climacteric ethylene production [71]. SlERF4 regulates the expression of SlIAA27, which controls ethylene and auxin signaling [72]. SlERF5 overexpression in tomato plants led to enhanced salt and drought stress resistance [44]. The evolutionary relationship between SlERF4 and SlERF5 is very close. SlERF4 has been functionally characterized under salt stress, disease resistance, fruit ripening, and auxin signaling. However, the function of SlERF4 in drought stress remains unclear. In this study, we demonstrated that SlbHLH96 physically interacts with SlERF4. The SlERF4 knockdown plants showed a higher MDA content than the control plants. Notably, MDA is a primary indicator of the peroxidation of membrane polyunsaturated fatty acids. Moreover, SOD and POD activities were higher in the control plants. Transcript levels of some stress-related genes and antioxidant-related genes were significantly lower in the SlERF4

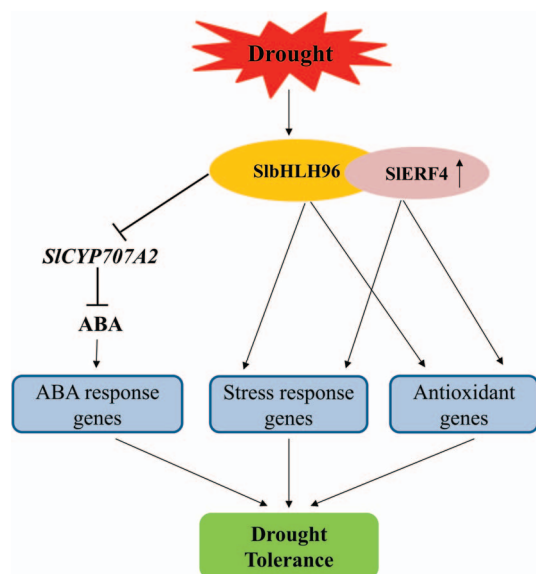

**Figure 10.** Proposed model for SlbHLH96 function under drought stress in tomato. SlbHLH96 is induced by drought stress. SlbHLH96 directly binds to cis-elements in the SICYP707A2 promoter and downregulates its transcription, leading to an increased level of ABA, which, in turn, regulates the expression of ABA response-related genes. Furthermore, SlbHLH96 interacts with SIERF4, and the SlbHLH96–SIERF4 complex may have additive effect on the expression of SICYP707A2. SlbHLH96 and SIERF4 may contribute to drought stress tolerance by modulating the expression of genes encoding antioxidants and stress-related genes.

knockdown plants. These results suggest that the SlbHLH96–SIERF4 complex is important in the regulation of expression of genes for ROS scavenging and stress responses under drought through an undefined mechanism.

Based on the results of this study, we proposed a working model for the function of SlbHLH96 under drought stress (Fig. 10). Briefly, drought stress induces SlbHLH96 expression. SlbHLH96 directly binds to cis-elements in the SICYP707A2 promoter and downregulates its transcription, leading to increased levels of endogenous ABA, which, in turn, regulates the expression of ABA response-related genes. Furthermore, SlbHLH96 physically interacts with SIERF4, and the SlbHLH96–SIERF4 complex controls the expression of genes encoding antioxidants and stress-related genes. The study unveils novel mechanisms by which SlbHLH96 confers drought tolerance to tomato plants, thus providing important clues for breeding drought-resistant crops.

## Materials and methods

### Plant growth conditions

The tomato cultivar ‘Alisa Craig’ (AC) was used in this study and it also served as the transgene recipient. The plants were cultivated in growth chambers under a 16-h day (at 25°C), 8-h night (at 22°C) cycle and 80% relative humidity.

### Abiotic stress and hormone treatments for gene expression analysis

Surface-sterilized AC seeds were planted on  $\frac{1}{2}$  MS (Murashige–Skoog) medium plates for germination. Seedlings of identical size were moved to  $\frac{1}{2}$  MS medium plates after 7 days. For treatment with cold stress, the medium plates were transferred to an illuminating incubator at 4°C and sampled at 0, 1, 3, 6, 12, and 24 h. For heat treatment, the plates were placed in an illuminating

incubator at 42°C and sampled at 0, 2, 4, 6, 12, and 24 h. For NaCl treatment, seedlings of similar size were transferred to  $\frac{1}{2}$  MS medium plates supplemented with 200 mM NaCl and incubated for 0, 1, 3, 6, 12, or 24 h for sampling. For PEG treatment, seedlings of similar size were transferred to  $\frac{1}{2}$  MS medium plates infused with different concentrations of PEG (average molecular weight 8000) solutions to achieve low water potentials from  $-0.25$  to  $-1.7$  MPa and incubated for 12 h. To detect the expression of SlbHLH96 in response to exogenous hormones, treatments were performed as follows: 7-day-old seedlings with similar size grown on  $\frac{1}{2}$  MS medium were transferred to  $\frac{1}{2}$  MS medium plates supplemented with 0, 10  $\mu$ M ABA, 10  $\mu$ M IAA (indole-3-acetic acid), 10  $\mu$ M GA<sub>3</sub> (gibberellic acid 3), 10  $\mu$ M SA (salicylic acid), or 10  $\mu$ M JA (jasmonic acid), and incubated for 0, 1, 3, 6, 12, and 24 h.

### Subcellular localization of SlbHLH96

The full-length complete coding sequence (CDS) of SlbHLH96 without the stop codon was constructed into a 35S promoter-driven pCAMBIA2300–GFP vector, resulting in the 35S–SlbHLH96–GFP plasmid. Leaves of *Nicotiana benthamiana* plants were infiltrated with the *Agrobacterium* strain GV3101 harboring the 35S–SlbHLH96–GFP plasmid or the empty vector of pCAMBIA2300–GFP (35S–GFP; as a control). Co-transformation of a red fluorescent protein (RFP) coupled with the nucleus marker mCherry made it possible to observe nuclei. After 48 hours, the fluorescence signals from the GFP protein expressed in the epidermal cells were observed with a BX53 (Olympus, Japan).

### Transcriptional activation analysis in yeast

The CDS and truncation of SlbHLH96 were inserted into the pGBKT7 vector. The plasmids were inserted into Y2H–Gold, and were then grown on SD/–Leu and SD/–Leu/–Trp/–His medium at 30°C for 3 days.

### Tomato transformation

The full-length CDS of SlbHLH96 was amplified by PCR from the first-strand tomato cDNA synthesized with the SlbHLH96-specific primer. Then, the SlbHLH96 CDS was constructed into the plant expression vector pBI121. Finally, the recombinant vector was introduced into tomato cultivar AC by tissue culture-based *Agrobacterium*-mediated stable transformation (strain GV3101).

### RNA extraction and qRT–PCR analysis

Total RNA was isolated from AC tomato leaves using TRIzol (Tiangen, China). The cDNA was synthesized from the total RNA using the M-MLV Reverse Transcriptase kit (Vazyme, China). qRT–PCR reactions were performed with Tip Green SuperMix (TransGen, China). The relative expression was calculated using the  $2^{-\Delta\Delta Ct}$  method. The SLACTIN7 gene was used as a reference gene. Primer sequences in this study are listed in Supplementary Data Table 1.

### Methods for physiological measurements

NBT and DAB staining assays were performed as previously described [73]. O<sub>2</sub><sup>•−</sup> content and H<sub>2</sub>O<sub>2</sub> content were determined using Solarbio detection kits (Solarbio, China).

The relative electrolytic leakage was measured to assess injuries to biological membranes as described previously [74]. The MDA content and proline content were measured as previously described [74, 75]. The activities of SOD and POD were measured as previously described [74].

## Measurement of ABA content

Endogenous ABA was extracted from freshly collected tomato leaves using extraction buffer [methanol:isopropanol:acetic acid = 20:79:1 (v:v:v)]. ABA content was determined using a UPLC-MS/MS system (QTRAP™ 5500 LC/MS/MS, USA).

## Virus-induced gene silencing

VIGS assays were conducted as previously described [76, 77]. A particular 300-bp sequence from *SlERF4* or *SlbHLH96* was designed using the SGN VIGS Tool (<http://vigs.solgenomics.net/>). A fragment of *SlERF4* or *SlbHLH96* was inserted into the pTRV2 vector for the construction of recombinant plasmid pTRV2:*SlERF4* and pTRV2:*SlbHLH96*, respectively. pTRV2:00 (negative control), pTRV2:*SlPDS* (positive control), pTRV2:*SlERF4*, or pTRV2:*SlbHLH96* was mixed at a 1:1 ratio with pTRV1. The cotyledons of tomato plants were infiltrated with inoculant of *Agrobacterium* suspensions ( $OD_{600} = 1.0$ ). When pTRV2:*SlPDS* plants showed a photo-bleached phenomenon, the silencing efficiency in pTRV2:*SlERF4* or pTRV2:*SlbHLH96* plants was analyzed using qRT-PCR.

## Bimolecular fluorescence complementation assay

The full-length CDS of *SlbHLH96* was cloned into pSPYCE vector to fuse with half of a YFP protein (*SlbHLH96*-cYFP). The full-length CDS of *SlERF4* was cloned into a pSPYNE vector to fuse with half of a YFP protein (*SlERF4*-nYFP). The recombinant plasmids were transformed into GV3101, which were then used to co-infiltrate *N. benthamiana* leaves. After 48 hours, fluorescence was observed with the BX53 (Olympus, Japan).

## Yeast two-hybrid assay

The full-length *SlERF4* and truncation of *SlbHLH96* were introduced into the pGADT7 and pGBKT7 vectors, respectively. The plasmids were introduced into yeast strain AH109 and grown on -Leu/-Trp/-His/-Ade medium (Coolaber, China).

## GST pull-down

Full-length *SlbHLH96* and *SlERF4* were inserted into the pMAL-c5X and pET42a vectors, respectively. The fusion proteins were purified with Amylose resin (NEB, USA) and Glutathione resin (GenScript, China), respectively. The GST pull-down assays were performed according to the MagneGST™ protein purification system User Manual (Promega, USA). The proteins were detected by western blotting with anti-MBP antibody and anti-GST antibody.

## Split-luciferase assay

Full-length *SlbHLH96* and *SlERF4* were cloned into the pCAMBIA1300-cLuc and pCAMBIA1300-nLuc vectors, respectively. The recombinant plasmids were transformed into *Agrobacterium tumefaciens* strain GV3101, and were then used to co-infiltrate *N. benthamiana* leaves. After 3 days, fluorescence was detected by a camera system (Lumazone Pylon 2048B, Princeton, USA).

## Dual-luciferase assay

The CDS of *SlbHLH96* and *SlERF4* was cloned into the pGreen62-SK vector. The promoters of *SlCYP707A2*, *SlCAT1*, and *SlPOD* were introduced into the pGreen0800-LUC vector, respectively. The recombinant vectors were transformed into GV3101 (pSoup-19) and infiltrated into 4-week-old *N. benthamiana* leaves. The Dual-Luciferase® kit (Promega, USA) was used for dual-luciferase assays.

## Yeast one-hybrid assay

The promoter regions (P1 with one G-box and one E-box; P2 with 2 E-boxes) of *SlCYP707A2* were inserted to pHis2 and transformed into the Y187 yeast strain. The recombinant yeast strain was transformed with the *SlbHLH96*-pGADT7 plasmid and the empty pGADT7 plasmid, respectively. The interactions between *SlbHLH96* and *SlCYP707A2* promoter regions were indicated by the growth of the colony on SD/-Leu/-Trp/-His in the presence of 3-AT.

## Electrophoretic mobility shift assay

The CDS of *SlbHLH96* was cloned into pMAL-c5X to fuse with MBP. The *SlbHLH96*-MBP fusion protein was induced in *Escherichia coli* BL21 (DE3). EMSA was conducted as previously described [78].

## Statistical analysis

Data are reported as the means  $\pm$  standard deviation. Statistical significance was determined by one-way ANOVA (Tukey's test) using SPSS (version 26.0, USA). Variations were considered significant if  $P < .05$ . In some cases, significant differences in mean values, determined by Student's t-test, are indicated by asterisk(s) (\* $P < .05$ ; \*\* $P < .01$ ).

## Acknowledgements

The authors thank Dr Qingmei Guan from Northwest A&F University and graduate students (Xuewei Li, Chungong Niu, Dehui Zhang, Lijuan Jiang, Xiaoxia Shen, Fang Zhi, Fuguo Cao, Junxing Guo, Zeyuan Liu, and Gege Qin) for providing experimental consultation. The authors are grateful to experimentalists Minrong Luo and Hua Zhao (Northwest A&F University) for providing professional technical assistance.

This work was funded by the National Natural Science Foundation of China (grant numbers 31671273 and 31701925), the Key Research and Development Plan of Shaanxi Province (grant number 2020ZDLNY01-03), and the 100 Talents Plan of Shaanxi Province.

## Author contributions

Y.(Yunfei)L., X.Z., and J.Z. conceived the experiments. Y.(Yunfei)L. and F.M. performed the experiments. B.L., C.G., T.H., M.Z., and Y.(Yan)L. participated in the production of the experiment materials. Y.(Yunfei)L. wrote the paper. Y.(Yunfei)L., X.Z., and J.Z. revised the paper.

## Data availability

The data that support the results are provided in this paper and its supplementary files.

## Conflict of interest

The authors declare no competing interests.

## Supplementary Data

Supplementary data is available at *Horticulture Research* online.

## References

- Zhu J-K. Abiotic stress signaling and responses in plants. *Cell*. 2016;167:313–24.

2. Gong Z, Xiong L, Shi H et al. Plant abiotic stress response and nutrient use efficiency. *Sci China Life Sci.* 2020;**63**:635–74.
3. Zhang H, Zhu J, Gong Z et al. Abiotic stress responses in plants. *Nat Rev Genet.* 2022;**23**:104–19.
4. Farooq M, Wahid A, Kobayashi N et al. Plant drought stress: effects, mechanisms and management. *Agron Sustain Dev.* 2009;**29**:185–212.
5. Wang L, Chen L, Li R et al. Reduced drought tolerance by CRISPR/Cas9-mediated *SIMAPK3* mutagenesis in tomato plants. *J Agric Food Chem.* 2017;**65**:8674–82.
6. Chen M, Zhao Y, Zhuo C et al. Overexpression of a NF-YC transcription factor from bermudagrass confers tolerance to drought and salinity in transgenic rice. *Plant Biotechnol J.* 2015;**13**:482–91.
7. Munné-Bosch S, Peñuelas J. Photo- and antioxidative protection, and a role for salicylic acid during drought and recovery in field-grown *Phillyrea angustifolia* plants. *Planta.* 2003;**217**:758–66.
8. Moschou PN, Paschalidis KA, Delis ID et al. Spermidine exodus and oxidation in the apoplast induced by abiotic stress is responsible for H<sub>2</sub>O<sub>2</sub> signatures that direct tolerance responses in tobacco. *Plant Cell.* 2008;**20**:1708–24.
9. Zhu J-K. Salt and drought stress signal transduction in plants. *Annu Rev Plant Biol.* 2002;**53**:247–73.
10. Yang R, Yang T, Zhang H et al. Hormone profiling and transcription analysis reveal a major role of ABA in tomato salt tolerance. *Plant Physiol Biochem.* 2014;**77**:23–34.
11. Iuchi S, Kobayashi M, Taji T et al. Regulation of drought tolerance by gene manipulation of 9-cis-epoxycarotenoid dioxygenase, a key enzyme in abscisic acid biosynthesis in *Arabidopsis*. *Plant J.* 2001;**27**:325–33.
12. Schwartz SH, Qin XZeevaart JAD. Elucidation of the indirect pathway of abscisic acid biosynthesis by mutants, genes, and enzymes. *Plant Physiol.* 2003;**131**:1591–601.
13. Sun L, Sun Y, Zhang M et al. Suppression of 9-cis-epoxycarotenoid dioxygenase, which encodes a key enzyme in abscisic acid biosynthesis, alters fruit texture in transgenic tomato. *Plant Physiol.* 2012;**158**:283–98.
14. Sun L, Yuan B, Zhang M et al. Fruit-specific RNAi-mediated suppression of *SINCE1* increases both lycopene and  $\beta$ -carotene contents in tomato fruit. *J Exp Bot.* 2012;**63**:3097–108.
15. Ji K, Kai W, Zhao B et al. *SINCE1* and *SlCYP707A2*: key genes involved in ABA metabolism during tomato fruit ripening. *J Exp Bot.* 2014;**65**:5243–55.
16. Kushiro T, Okamoto M, Nakabayashi K et al. The *Arabidopsis* cytochrome P450 CYP707A encodes ABA 8'-hydroxylases: key enzymes in ABA catabolism. *EMBO J.* 2004;**23**:1647–56.
17. Umezawa T, Okamoto M, Kushiro T et al. CYP707A3, a major ABA 8'-hydroxylase involved in dehydration and rehydration response in *Arabidopsis thaliana*. *Plant J.* 2006;**46**:171–82.
18. Saito S, Hirai N, Matsumoto C et al. *Arabidopsis* CYP707As encode (+)-abscisic acid 8'-hydroxylase, a key enzyme in the oxidative catabolism of abscisic acid. *Plant Physiol.* 2004;**134**:1439–49.
19. Fujii H, Chinnusamy V, Rodrigues A et al. *In vitro* reconstitution of an abscisic acid signalling pathway. *Nature.* 2009;**462**:660–4.
20. Ma Y, Szostkiewicz I, Korte A et al. Regulators of PP2C phosphatase activity function as abscisic acid sensors. *Science.* 2009;**324**:1064–8.
21. Park S-Y, Fung P, Nishimura N et al. Abscisic acid inhibits type 2C protein phosphatases via the PYR/PYL family of START proteins. *Science.* 2009;**324**:1068–71.
22. Umezawa T, Sugiyama N, Mizoguchi M et al. Type 2C protein phosphatases directly regulate abscisic acid-activated protein kinases in *Arabidopsis*. *Proc Natl Acad Sci USA.* 2009;**106**:17588–93.
23. Penfield S, Josse EM, Kannangara R et al. Cold and light control seed germination through the bHLH transcription factor SPATULA. *Curr Biol.* 2005;**15**:1998–2006.
24. Castelain M, Le Hir RBellini C. The non-DNA-binding bHLH transcription factor *PRE3/bHLH135/ATBS1/TMO7* is involved in the regulation of light signaling pathway in *Arabidopsis*. *Physiol Plant.* 2012;**145**:450–60.
25. Zhang L, Kang J, Xie Q et al. The basic helix-loop-helix transcription factor bHLH95 affects fruit ripening and multiple metabolisms in tomato. *J Exp Bot.* 2020;**71**:6311–27.
26. Chen Y, Su D, Li J et al. Overexpression of bHLH95, a basic helix-loop-helix transcription factor family member, impacts trichome formation via regulating gibberellin biosynthesis in tomato. *J Exp Bot.* 2020;**71**:3450–62.
27. Menand B, Yi K, Jouannic S et al. An ancient mechanism controls the development of cells with a rooting function in land plants. *Science.* 2007;**316**:1477–80.
28. Liu W, Tai H, Li S et al. bHLH122 is important for drought and osmotic stress resistance in *Arabidopsis* and in the repression of ABA catabolism. *New Phytol.* 2013;**201**:1192–204.
29. Seo J-S, Joo J, Kim MJ et al. OsbHLH148, a basic helix-loop-helix protein, interacts with OsJAZ proteins in a jasmonate signaling pathway leading to drought tolerance in rice. *Plant J.* 2011;**65**:907–21.
30. Li J, Wang T, Han J et al. Genome-wide identification and characterization of cucumber bHLH family genes and the functional characterization of *CsbHLH041* in NaCl and ABA tolerance in *Arabidopsis* and cucumber. *BMC Plant Biol.* 2020;**20**:272.
31. Waseem M, Rong XLi Z. Dissecting the role of a basic helix-loop-helix transcription factor, *SlbHLH22*, under salt and drought stresses in transgenic *Solanum lycopersicum* L. *Front Plant Sci.* 2019;**10**:734.
32. Yu C, Yan M, Dong H et al. Maize bHLH55 functions positively in salt tolerance through modulation of AsA biosynthesis by directly regulating GDP-mannose pathway genes. *Plant Sci.* 2021;**302**:110676.
33. Xie X, Li S, Zhang RF et al. The bHLH transcription factor *MdbHLH3* promotes anthocyanin accumulation and fruit colouration in response to low temperature in apples. *Plant Cell Environ.* 2012;**35**:1884–97.
34. Geng J, Wei T, Wang Y et al. Overexpression of *PttrbHLH*, a basic helix-loop-helix transcription factor from *Poncirus trifoliata*, confers enhanced cold tolerance in pummelo (*Citrus grandis*) by modulation of H<sub>2</sub>O<sub>2</sub> level via regulating a CAT gene. *Tree Physiol.* 2020;**39**:2045–54.
35. Sharma MK, Kumar R, Solanke AU et al. Identification, phylogeny, and transcript profiling of ERF family genes during development and abiotic stress treatments in tomato. *Mol Gen Genomics.* 2010;**284**:455–75.
36. Zhou J, Tang XMartin GB. The Pto kinase conferring resistance to tomato bacterial speck disease interacts with proteins that bind a cis-element of pathogenesis-related genes. *EMBO J.* 1997;**16**:3207–18.
37. Okamoto JK, Caster B, Villarreal R et al. The AP2 domain of APETALA2 defines a large new family of DNA binding proteins in *Arabidopsis*. *Proc Natl Acad Sci USA.* 1997;**94**:7076–81.
38. Weigel D. The APETALA2 domain is related to a novel type of DNA binding domain. *Plant Cell.* 1995;**7**:388–9.

39. Quan R, Hu S, Zhang Z et al. Overexpression of an ERF transcription factor *TSRF1* improves rice drought tolerance. *Plant Biotechnol J*. 2010;**8**:476–88.
40. Huang S, Ma Z, Hu L et al. Involvement of rice transcription factor *OsERF19* in response to ABA and salt stress responses. *Plant Physiol Biochem*. 2021;**167**:22–30.
41. Park S-I, Kwon HJ, Cho MH et al. The *OsERF115/AP2EREBP110* transcription factor is involved in the multiple stress tolerance to heat and drought in rice plants. *Int J Mol Sci*. 2021;**22**:7181.
42. Wang S, Huang J, Wang X et al. *PagERF16* of *Populus* promotes lateral root proliferation and sensitizes to salt stress. *Front Plant Sci*. 2021;**12**:669143.
43. Li Z, Tian Y, Xu J et al. A tomato ERF transcription factor, *SlERF84*, confers enhanced tolerance to drought and salt stress but negatively regulates immunity against *Pseudomonas syringae* pv. *Tomato* DC3000. *Plant Physiol Biochem*. 2018;**132**:683–95.
44. Pan Y, Seymour GB, Lu C et al. An ethylene response factor (ERF5) promoting adaptation to drought and salt tolerance in tomato. *Plant Cell Rep*. 2012;**31**:349–60.
45. Zhu G, Wang S, Huang Z et al. Rewiring of the fruit metabolome in tomato breeding. *Cell*. 2018;**172**:249–261.e12.
46. Lin T, Zhu G, Zhang J et al. Genomic analyses provide insights into the history of tomato breeding. *Nat Genet*. 2014;**46**:1220–6.
47. Klay I, Pirrello J, Riahi L et al. Ethylene response factor *Sl-ERF.B.3* is responsive to abiotic stresses and mediates salt and cold stress response regulation in tomato. *Sci World J*. 2014;**2014**:167681.
48. Geng J, Liu J. The transcription factor *CsbHLH18* of sweet orange functions in modulation of cold tolerance and homeostasis of reactive oxygen species by regulating the antioxidant gene. *J Exp Bot*. 2018;**69**:2677–92.
49. Huang X, Wang W, Zhang Q et al. A basic helix-loop-helix transcription factor, *PtrbHLH*, of *Poncirus trifoliata* confers cold tolerance and modulates peroxidase-mediated scavenging of hydrogen peroxide. *Plant Physiol*. 2013;**162**:1178–94.
50. Kudo M, Kidokoro S, Yoshida T et al. Double overexpression of *DREB* and *PIF* transcription factors improves drought stress tolerance and cell elongation in transgenic plants. *Plant Biotechnol J*. 2017;**15**:458–71.
51. Chen M, Wang QY, Cheng XG et al. *GmDREB2*, a soybean DRE-binding transcription factor, conferred drought and high-salt tolerance in transgenic plants. *Biochem Biophys Res Commun*. 2007;**353**:299–305.
52. Yamaguchi-Shinozaki K, Shinozaki K. Transcriptional regulatory networks in cellular responses and tolerance to dehydration and cold stresses. *Annu Rev Plant Biol*. 2006;**57**:781–803.
53. Orellana S, Yañez M, Espinoza A et al. The transcription factor *SlAREB1* confers drought, salt stress tolerance and regulates biotic and abiotic stress-related genes in tomato. *Plant Cell Environ*. 2010;**33**:2191–208.
54. Zhao Y, Chan Z, Gao J et al. ABA receptor *PYL9* promotes drought resistance and leaf senescence. *Proc Natl Acad Sci USA*. 2016;**113**:1949–54.
55. Kai W, Wang J, Liang B et al. *PYL9* is involved in the regulation of ABA signaling during tomato fruit ripening. *J Exp Bot*. 2019;**70**:6305–19.
56. Chen Y, Feng L, Wei N et al. Overexpression of cotton *PYL* genes in *Arabidopsis* enhances the transgenic plant tolerance to drought stress. *Plant Physiol Biochem*. 2017;**115**:229–38.
57. He Z, Zhong J, Sun X et al. The maize ABA receptors *ZmPYL8*, *9*, and *12* facilitate plant drought resistance. *Front Plant Sci*. 2018;**9**:422.
58. Liang B, Sun Y, Wang J et al. Tomato protein phosphatase *2C* influences the onset of fruit ripening and fruit glossiness. *J Exp Bot*. 2021;**72**:2403–18.
59. Zhang Y, Li Q, Jiang L et al. Suppressing type *2C* protein phosphatases alters fruit ripening and the stress response in tomato. *Plant Cell Physiol*. 2018;**59**:142–54.
60. Miao J, Li X, Li X et al. *OsPP2C09*, a negative regulatory factor in abscisic acid signalling, plays an essential role in balancing plant growth and drought tolerance in rice. *New Phytol*. 2020;**227**:1417–33.
61. Yu X, Han J, Li L et al. Wheat *PP2C-a10* regulates seed germination and drought tolerance in transgenic *Arabidopsis*. *Plant Cell Rep*. 2020;**39**:635–51.
62. He Z, Wu J, Sun X et al. The maize clade a *PP2C* phosphatases play critical roles in multiple abiotic stress responses. *Int J Mol Sci*. 2019;**20**:3573.
63. Zhang Y, Wan S, Liu X et al. Overexpression of *CsSnRK2.5* increases tolerance to drought stress in transgenic *Arabidopsis*. *Plant Physiol Biochem*. 2020;**150**:162–70.
64. Shao Y, Zhang X, Nocker S et al. Overexpression of a protein kinase gene *MpSnRK2.10* from *Malus prunifolia* confers tolerance to drought stress in transgenic *Arabidopsis thaliana* and apple. *Gene*. 2019;**692**:26–34.
65. Fujita Y, Nakashima K, Yoshida T et al. Three *SnRK2* protein kinases are the main positive regulators of abscisic acid signaling in response to water stress in *Arabidopsis*. *Plant Cell Physiol*. 2009;**50**:2123–32.
66. Nakashima K, Fujita Y, Kanamori N et al. Three *Arabidopsis* *SnRK2* protein kinases, *SRK2D/SnRK2.2*, *SRK2E/SnRK2.6/OST1* and *SRK2I/SnRK2.3*, involved in ABA signaling are essential for the control of seed development and dormancy. *Plant Cell Physiol*. 2009;**50**:1345–63.
67. Sun H, Fan H Ling H. Genome-wide identification and characterization of the *bHLH* gene family in tomato. *BMC Genomics*. 2015;**16**:9.
68. Kim J-G, Mudgett MB. Tomato *bHLH132* transcription factor controls growth and defense and is activated by *Xanthomonas euvesicatoria* effector *XopD* during pathogenesis. *Mol Plant Microbe Interact*. 2019;**32**:1614–22.
69. Li Q, Chen P, Dai S et al. *PacCYP707A2* negatively regulates cherry fruit ripening while *PacCYP707A1* mediates drought tolerance. *J Exp Bot*. 2015;**66**:3765–74.
70. Kim J-G, Stork WMudgett MB. *Xanthomonas* type III effector *XopD* desumoylates tomato transcription factor *SlERF4* to suppress ethylene responses and promote pathogen growth. *Cell Host Microbe*. 2013;**13**:143–54.
71. Liu M, Diretto G, Pirrello J et al. The chimeric repressor version of an *Ethylene Response Factor* (ERF) family member, *Sl-ERF.B3*, shows contrasting effects on tomato fruit ripening. *New Phytol*. 2014;**203**:206–18.
72. Liu M, Chen Y, Chen Y et al. The tomato ethylene response factor *Sl-ERF.B3* integrates ethylene and auxin signaling via direct regulation of *Sl-aux/IAA27*. *New Phytol*. 2018;**219**:631–40.
73. Hu T, Wang S, Wang Q et al. A tomato dynein light chain gene *SlLC6D* is a negative regulator of chilling stress. *Plant Sci*. 2021;**303**:110753.
74. Hu T, Wang Y, Wang Q et al. The tomato 2-oxoglutarate-dependent dioxygenase gene *SlF3HL* is critical for chilling stress tolerance. *Hortic Res*. 2019;**6**:45.
75. Ahammed GJ, Li X, Wan H et al. *SlWRKY81* reduces drought tolerance by attenuating proline biosynthesis in tomato. *Sci Hortic*. 2020;**270**:109444.

76. Chi C, Xu X, Wang M et al. Strigolactones positively regulate abscisic acid-dependent heat and cold tolerance in tomato. *Hortic Res.* 2021;**8**:237.
77. Ahammed GJ, Li X, Yang Y et al. Tomato WRKY81 acts as a negative regulator for drought tolerance by modulating guard cell H<sub>2</sub>O<sub>2</sub>-mediated stomatal closure. *Environ Exp Bot.* 2020;**171**:103960.
78. Wang Z, Wang F, Hong Y et al. The flowering repressor SVP confers drought resistance in *Arabidopsis* by regulating abscisic acid catabolism. *Mol Plant.* 2018;**11**:1184–97.
